# Supplementary material for: Copper(ii) tungstate nanoflake array films: sacrificial template synthesis, hydrogen treatment, and their application as photoanodes in solar water splitting
Source: Royal Society of Chemistry journal article supplement (doi:10.1039/c5nr09210h), 2016-01-01
Supplement: c5nr09210h1.pdf [file c5nr09210h1.pdf]

## **Electronic Supplementary Information**

# **Copper (II) Tungstate Nanoflake Array Films: Sacrificial Template Synthesis, Hydrogen Treatment, and Their Application as Photoanodes in Solar Water Splitting**

*Dianyi Hu, Peng Diao,\* Di Xu, Mengyang Xia, Yue Gu, Qingyong Wu, Chao Li, Shubin Yang*

Key Laboratory of Aerospace Materials and Performance (Ministry of Education), School of  
Materials Science and Engineering, Beihang University, Beijing 100191, P. R. China

Corresponding Author: Peng Diao. Tel: 86-10-8233-9562 E-mail: pdiao@buaa.edu.cn

**Fig. S1** TEM images and SAED patterns of  $\text{WO}_3$  and  $\text{CuWO}_4$  nanoflakes

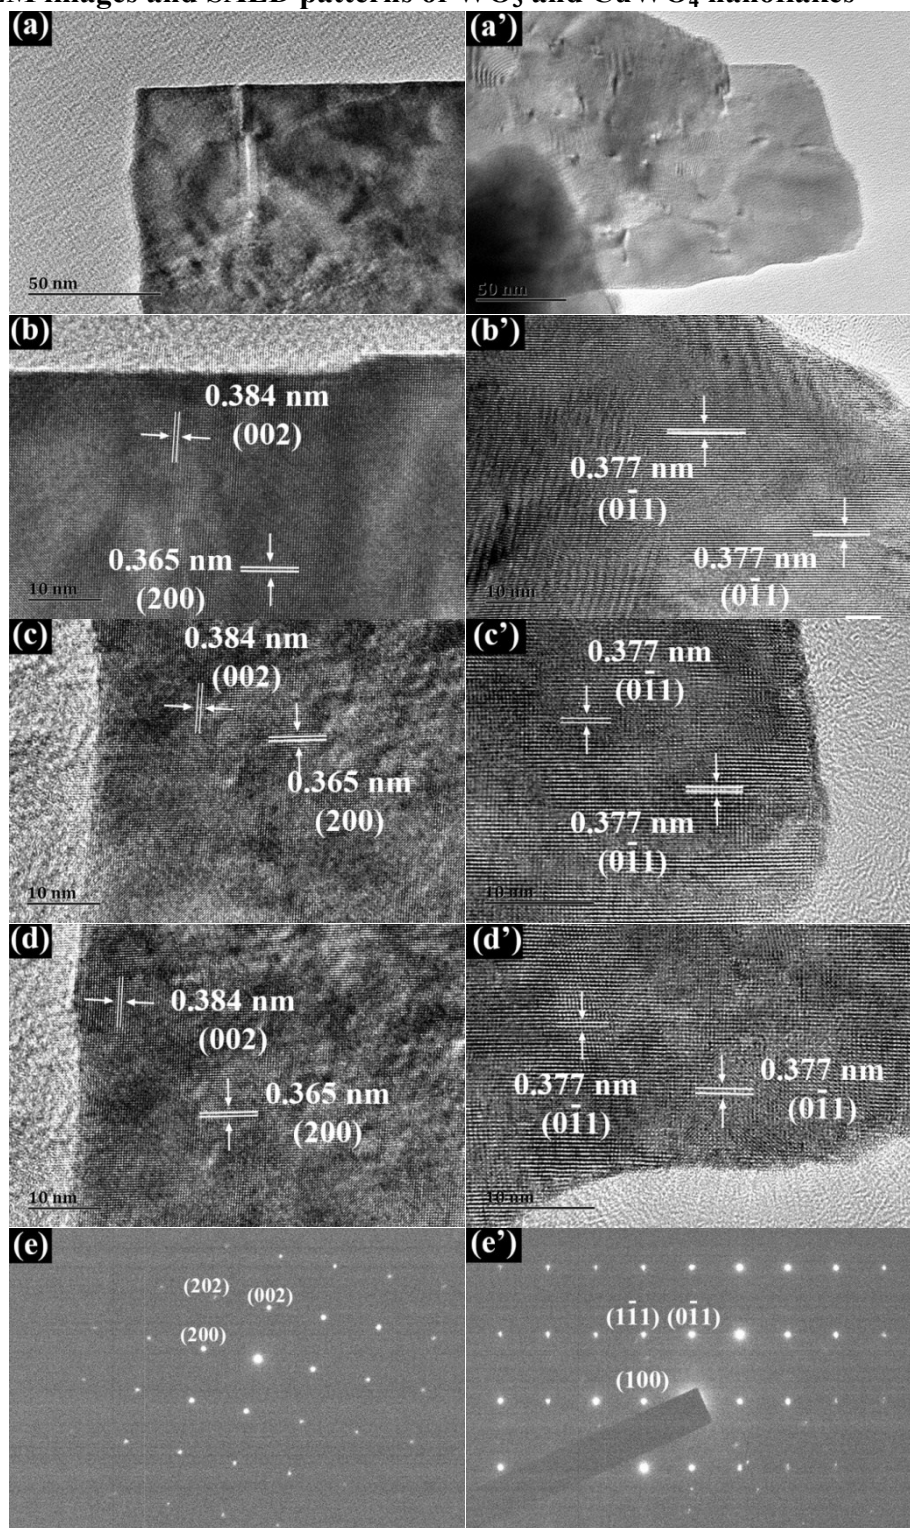

**Fig. S1** TEM images of  $\text{WO}_3$  (a-d) and  $\text{CuWO}_4$  (a'-d'). SAED patterns of  $\text{WO}_3$  (e) and  $\text{CuWO}_4$  (e').

**Fig. S2 Linear potential sweep measurements of CuWO<sub>4</sub> and H-treated CuWO<sub>4</sub> in 0.1 M phosphate buffer (pH 7)**

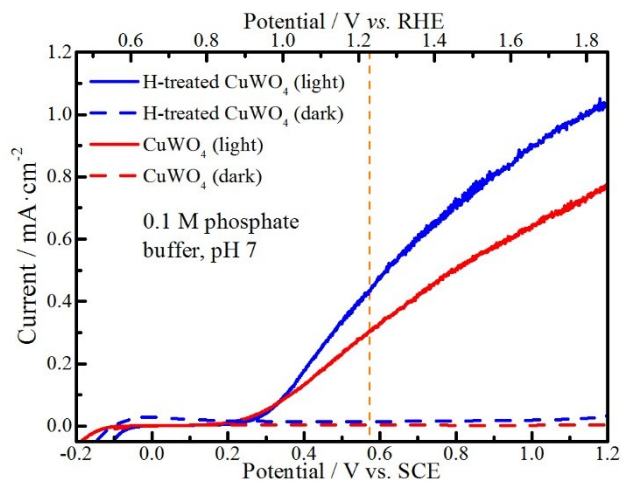

**Fig. S2** Current density-potential responses of the H-treated CuWO<sub>4</sub> photoanodes in 0.1 M sodium phosphate buffer solution (pH 7) at potential sweep rate of 10 mV·s<sup>-1</sup> in the dark and under illumination (100 mW·cm<sup>-2</sup>). The current density-potential response of the CuWO<sub>4</sub> photoanode is also presented for comparison.
